# Supplementary material
Source: HighWire-hosted journal article supplement (https://bibliotheek.ehb.be/content/suppl/2023/06/19/10.1.e001571)
Supplement: bmjresp-2022-001571supp001_data_supplement.pdf [file bmjresp-2022-001571supp001_data_supplement.pdf]

## Appendix A.

Table A1. Outcomes identified during the overview of reviews and consumer focus groups and interviews

| Outcome Name                   | Outcome Description                                                                                                                                                                                                        |
|--------------------------------|----------------------------------------------------------------------------------------------------------------------------------------------------------------------------------------------------------------------------|
| Activities of daily living     | The ability to carry out usual everyday activities including looking after yourself (e.g., bathing, dressing or feeding), or other activities (e.g., cooking, cleaning, managing finances, caring for others or shopping)  |
| Appetite                       | The natural and recurring desire for food and drink                                                                                                                                                                        |
| Balance                        | The ability to remain upright and steady                                                                                                                                                                                   |
| Balance confidence             | The confidence that you can perform activities without losing balance (e.g., walking inside or outside the home, climbing stairs, standing on tip toes to reach for an object, bending to pick something up off the floor) |
| Body composition               | The amount of fat, muscle and bone in your body                                                                                                                                                                            |
| Breathlessness                 | How short of breath you are                                                                                                                                                                                                |
| Cognition                      | The ability to learn, think, remember things, problem solve, understand instructions, make decisions or pay attention                                                                                                      |
| Emotional and Mental Wellbeing | Your mood - whether and how often you feel happy, calm, anxious, depressed, sad or angry - and your self esteem                                                                                                            |
| Fatigue                        | An overwhelming, sustained feeling of exhaustion, mental or physical tiredness, having little energy for physical and mental work                                                                                          |
| Haematological status          | Components of your blood (e.g., levels of inflammation, the amount of red or white blood cells)                                                                                                                            |
| Health-related quality of life | How well you feel about life; how much your health is affecting your quality of life                                                                                                                                       |
| Lung function                  | How well your lungs work to help you breath                                                                                                                                                                                |
| Muscle oxygenation             | Use of oxygen by your muscles when you exercise                                                                                                                                                                            |

|                                                       |                                                                                                                                                                                                        |
|-------------------------------------------------------|--------------------------------------------------------------------------------------------------------------------------------------------------------------------------------------------------------|
| Neurological symptoms                                 | This may include numbness (reduced sensation of surfaces and their texture or quality) or weakness (loss of muscle strength) in your arms and/or legs                                                  |
| Nutrition status                                      | Changes to your weight, food intake and/or taste                                                                                                                                                       |
| Pain                                                  | A sensation of unpleasant feeling indicating potential or actual damage to any part of your body                                                                                                       |
| Peripheral skeletal muscle strength                   | The strength of the muscles in your arms and/or legs                                                                                                                                                   |
| Physical activity levels                              | How active you are (e.g., the number of steps you take a day, how long you are active for, how much time you spend sitting)                                                                            |
| Physical fitness                                      | How fit you are. Your ability to perform sports, occupations and daily activities                                                                                                                      |
| Physical function                                     | Having the mobility and strength to perform activities required for day to day tasks (e.g., get out of bed, stand up from a chair, walking, or climbing stairs)                                        |
| Resilience                                            | The ability to cope with and recover quickly from difficult situations                                                                                                                                 |
| Respiratory muscle strength                           | The strength of the muscles that help you to breathe in and out                                                                                                                                        |
| Return to work or prior role                          | Returning to your previous job (full or part-time), changing to a different job, or doing the same thing you did before your lung cancer diagnosis                                                     |
| Self-efficacy                                         | Self-belief that you can manage your condition or symptoms or complete your rehabilitation program                                                                                                     |
| Sleep and related symptoms                            | The quality of your sleep (e.g., how long you take to go to sleep, how many times you wake up at night, how much sleep you get)                                                                        |
| Social roles, activities or relationships and support | Connecting with others and maintaining family, friendship and/or romantic relationships. The ability and desire to join in activities with others. The support you receive from family and/or friends. |
| Treatment response                                    | Your response to medical treatments (e.g., chemotherapy, radiotherapy, immunotherapy, targeted therapies)                                                                                              |
